# Supplementary material for: Experimental evaluation of the electron donor ability of a gold phosphine fragment in a gold carbene complex
Source: Royal Society of Chemistry journal article supplement (doi:10.1039/c3cc48869a), 2014-01-01
Supplement: c3cc48869a.pdf [file c3cc48869a.pdf]

## Supporting Information

**General methods.** Reactions were performed under a nitrogen atmosphere employing standard Schlenk and glovebox techniques unless specified otherwise. NMR spectra were obtained on a Varian spectrometer operating at 400 MHz for  $^1\text{H}$  NMR, 101 MHz for  $^{13}\text{C}$  NMR, and 161 MHz for  $^{31}\text{P}$  NMR in  $\text{CD}_2\text{Cl}_2$  at room temperature. Methylene chloride and diethylether were purified by passage through columns of activated alumina under nitrogen.  $\text{CD}_2\text{Cl}_2$  was dried over  $\text{CaH}_2$  prior to use. Chromium hexacarbonyl, bromocyclopropane, *tert*-butyllithium,  $[\text{P}(t\text{-Bu})_2o\text{-biphenyl}]\text{AuCl}$ ,  $\text{AgSbF}_6$ , hexanes, and pentane were purchased from major chemical suppliers and used as received.

**$(\text{CO})_5\text{CrC}(\text{OMe})(\text{c-Pr})$  (2).** Chromium complex **2** was synthesized using a modification<sup>S1</sup> of a published procedure.<sup>S2</sup> *tert*-Butyllithium (1.2 mL of a 1.7 M solution in hexane, 2.0 mmol) was added dropwise to a stirred solution of cyclopropylbromide (121 mg, 1.00 mmol) in  $\text{Et}_2\text{O}$  (2 mL) at  $-78\text{ }^\circ\text{C}$ , the resulting mixture was stirred for 30 min and transferred via canulae over 10 min to a suspension of chromium hexacarbonyl (220 mg, 1.00 mmol) in  $\text{Et}_2\text{O}$  (4 mL) at  $0\text{ }^\circ\text{C}$ . The resulting brown solution was warmed to room temperature and stirred for 2 h. The crude reaction mixture was concentrated under vacuum and the residue was dissolved in ice-cold deionized water. The reaction mixture was cooled at  $0\text{ }^\circ\text{C}$  and treated with trimethyloxonium tetrafluoroborate (0.30 g, 2.0 mmol) and the resultant solution was warmed to room temperature over 15 min. The crude reaction mixture was extracted with pentane ( $4 \times 30\text{ mL}$ ), and the combined organic fractions were dried ( $\text{Na}_2\text{SO}_4$ ), filtered, and concentrated to give a yellow solid that was chromatographed ( $\text{SiO}_2$ , pentane) to give **2** (158 mg, 57%) as a yellow solid.

**$\{[\text{P}(t\text{-Bu})_2o\text{-biphenyl}]\text{AuC}(\text{OMe})(\text{c-Pr})\}^+ \text{SbF}_6^-$  (1).** A suspension of  $[\text{P}(t\text{-Bu})_2o\text{-biphenyl}]\text{AuCl}$  (33 mg,  $6.2 \times 10^{-2}$  mmol) and  $\text{AgSbF}_6$  (21 mg,  $6.2 \times 10^{-2}$  mmol) in  $\text{CH}_2\text{Cl}_2$  (1 mL) was added to a stirred solution of **2** (51 mg, 0.19 mmol) in  $\text{CH}_2\text{Cl}_2$  (1 mL). The resulting solution was stirred 1 h and filtered through Celite, eluting with  $\text{CH}_2\text{Cl}_2$ . The filtrate was concentrated and dried to give a solid yellow residue that was triturated with pentane to give

**1** (51 mg, 66%) as a white solid.  $^1\text{H}$  NMR:  $\delta$  7.91 (dt,  $J = 2.4, 7.2$  1 H), 7.54 - 7.56 (m, 2 H), 7.53 (t,  $J = 7.6$  Hz, 2 H), 7.37-7.25 (m, 4 H), 4.53 (s, 3 H), 2.46 (tdd,  $J = 4.0, 8.4, 11.6$  Hz, 1 H), 1.89 - 1.81 (m, 2 H), 1.80 - 1.76 (m, 2 H), 1.42 (d,  $J = 15.6$  Hz, 18 H).  $^{13}\text{C}\{^1\text{H}\}$  NMR:  $\delta$  303.9 (d,  $J = 99.0$  Hz), 149.1 (d,  $J = 14.6$  Hz), 143.9 (d,  $J = 5.8$  Hz), 134.9, 133.5 (d,  $J = 7.5$  Hz), 131.8, 130.1, 129.8, 128.2 (d,  $J = 6.3$  Hz), 128.0, 125.5 (d,  $J = 42.3$  Hz), 71.5, 38.3 (d,  $J = 22.4$  Hz), 35.6 (d,  $J = 5.6$  Hz), 31.1 (d,  $J = 4.8$  Hz), 19.2.  $^{31}\text{P}\{^1\text{H}\}$  NMR:  $\delta$  62.2. Anal. Calcd (found) for  $\text{C}_{25}\text{H}_{35}\text{AuF}_6\text{PSb}$ : H, 4.32 (4.41); C, 37.46 (37.57).

## REFERENCES

S1) Semmelhack, M. F.; Lee, G. R. *Organometallics* **1987**, *6*, 1839.

S2) Turner, S. U.; Herndon, J. W.; McMullen, L. *J. Am. Chem. Soc.* **1992**, *114*, 8394.
